# Supplementary material for: Solvent–solvent and solvent–solute interactions in a 3D chloroform clathrate with diorganotin macrocycles in the nano-sized pores
Source: Royal Society of Chemistry journal article supplement (doi:10.1039/c1cc15957g), 2011-11-11
Supplement: c1cc15957g.pdf [file c1cc15957g.pdf]

## Supplementary Information

### **Solven-Solvent and Solvent-Solute Interactions in a 3D Chloroform Clathrate with Diorganotin Macrocycles in the Nano-sized Pores**

**Irán Rojas-León, Jorge A. Guerrero-Alvarez,\* Javier Hernández-Paredes, Herbert  
Höpfel\***

Centro de Investigaciones Químicas, Universidad Autónoma del Estado de Morelos  
Av. Universidad 1001, C.P. 62209 Cuernavaca, México  
E-mail: [hhopfl@uaem.mx](mailto:hhopfl@uaem.mx), [jguerrero@uaem.mx](mailto:jguerrero@uaem.mx)

#### **Available Information:**

- Experimental procedure and spectroscopic characterization (including 1D and 2D NMR spectra and FAB<sup>+</sup> spectrum of the metal complex)
- TG curve
- Additional figure of the [CDCl<sub>3</sub>]<sub>10</sub> cluster arrangements
- Supramolecular inclusion complex formed between the macrocycle and two CDCl<sub>3</sub> molecules
- Tables for intermolecular interactions

## 1. Experimental Procedure

*N,N'*-di(bicyclo[2.2.1]hept-2-yl)butane-1,4-diamine (0.200 g, 0.72 mmol), KOH (0.080 g, 1.44 mmol) and carbon disulfide (0.110 g, 1.44 mmol) were dissolved in methanol (5 mL) and stirred for 2 h, whereupon  $\text{Me}_2\text{SnCl}_2$  (0.16 g, 0.72 mmol) dissolved in methanol (10 mL) was added to the solution. A white powder precipitated immediately, which was separated by filtration, washed with distilled water and dried with *n*-hexane. Crystals suitable for single-crystal X-ray diffraction analysis were grown from  $\text{CDCl}_3$  within an NMR tube by slow evaporation of the solvent. Yield: 0.58 g (0.25 mmol), 68 %.

## 2. Instrumentation

NMR studies were carried out on a Varian Inova 400 instrument. Standards were TMS (internal,  $\delta^1\text{H} = 0.00$ ,  $\delta^{13}\text{C} = 0.0$  ppm) and  $\text{SnMe}_4$  (external,  $\delta^{119}\text{Sn} = 0.0$  ppm). Two dimensional  $^1\text{H}$ - $^1\text{H}$  COSY and  $^{13}\text{C}$ - $^1\text{H}$  HSQC NMR experiments have been carried out in order to completely assign the  $^1\text{H}$  and  $^{13}\text{C}$  spectra. The  $\text{FAB}^+$  mass spectrum was recorded on a Jeol JMS 700 equipment. The thermogravimetric analyses (TGA) were accomplished with a TA SDT Q600 instrument. Approximately 5 mg of the solid sample were quickly placed in an alumina crucible and analyzed in the temperature range of 30-400 °C with a 10 °C/min heating rate, using a current of 50 mL/min of nitrogen as inert gas purge.

### *Single-crystal X-ray diffraction analysis*

Single-crystal X-ray diffraction studies were performed on a Bruker-APEX diffractometer with a CCD area detector ( $\lambda_{\text{MoK}\alpha} = 0.71073$  Å, monochromator: graphite). Frames were collected at  $T = 100$  K via  $\omega/\phi$ -rotation at 10 s per frame (SMART).<sup>1a</sup> The measured intensities were reduced to  $F^2$  and corrected for absorption with SADABS (SAINT-NT).<sup>1b</sup> Corrections were made for Lorentz and polarization effects. Structure solution, refinement and data output were carried out with the SHELXTL-NT program package.<sup>1c,d</sup> Non hydrogen atoms were refined anisotropically. C-H and C-D hydrogen atoms were placed in geometrically calculated positions using the riding model. Two of the five independent chloroform molecules were disordered: one over two sites (occ. 0.81 and 0.19) and the second over three sites (occ. 0.21, 0.33 and 0.46). For the latter DFIX, SAME and EADP instructions have been during the least squares refinement.

CCDC No. 841834.

## References

- [1] (a) Bruker Analytical X-ray Systems. SMART: Bruker Molecular Analysis Research Tool, Versions 5.057 and 5.618, 1997 and 2000. (b) Bruker Analytical X-ray Systems. SAINT + NT, Versions 6.01 and 6.04, 1999 and 2001. (c) Sheldrick, G. M. SHELX86, Program for Crystal Structure Solution; University of Göttingen: Germany, 1986. (d) Bruker Analytical X-ray Systems. SHELXTL-NT Versions 5.10 and 6.10, 1999 and 2000.

## 3. Spectroscopic data

**$^1\text{H}$  NMR** (400 MHz,  $\text{CDCl}_3$ , 20 °C, TMS):  $\delta$  = 1.26-1.39 (br, H2, H3'<sub>endo</sub>, H5'<sub>endo</sub>, H6, H7), 1.47 (br, Sn-Me), 1.62 (br, H5'<sub>exo</sub>), 1.95 (br, H3'<sub>exo</sub>), 2.31 (br, H4'), 2.95 (br, H1'), 3.18 and 4.33 (br, ABX<sub>2</sub> system, H1), 4.88 (br, H2'<sub>exo</sub>) ppm.  **$^{13}\text{C}$  NMR** (100 MHz,  $\text{CDCl}_3$ , 20 °C, TMS):  $\delta$  = 15.2 (Sn-Me), 22.9 (C6'), 25.2 (C2), 29.6 (C5'), 33.3 (C3'), 37.2 (C4'), 38.2 (C7'), 40.6 (C1'), 51.6 (C1), 65.8 (C2'), 200.6 (CS<sub>2</sub>) ppm.  **$^{119}\text{Sn}$  NMR** (75 MHz,  $\text{CDCl}_3$ , 20 °C,  $\text{SnMe}_4$ )  $\delta$  = -332 ppm.

**MS** (FAB<sup>+</sup>):  $m/z$  (%): 1150 (M, 1.3), 1135 (M-Me, 3).

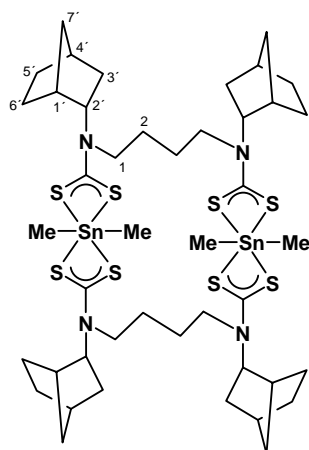

**$^1\text{H}$ -NMR spectrum**

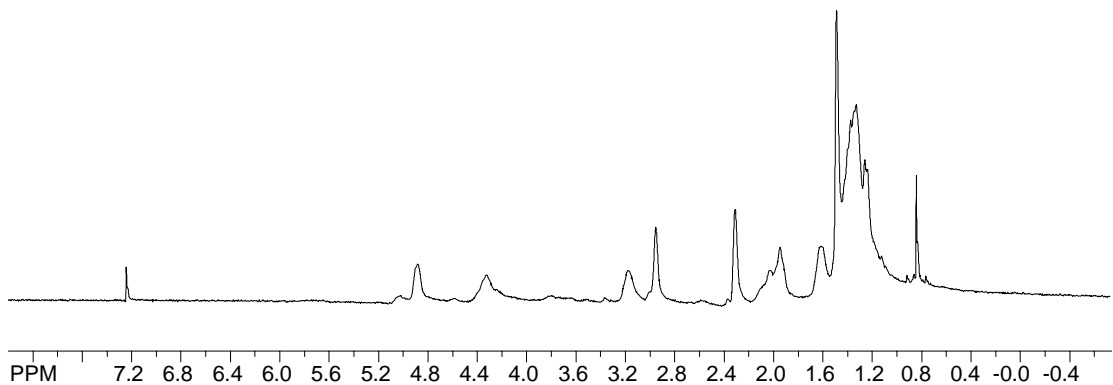

**$^{13}\text{C}$  NMR spectrum**

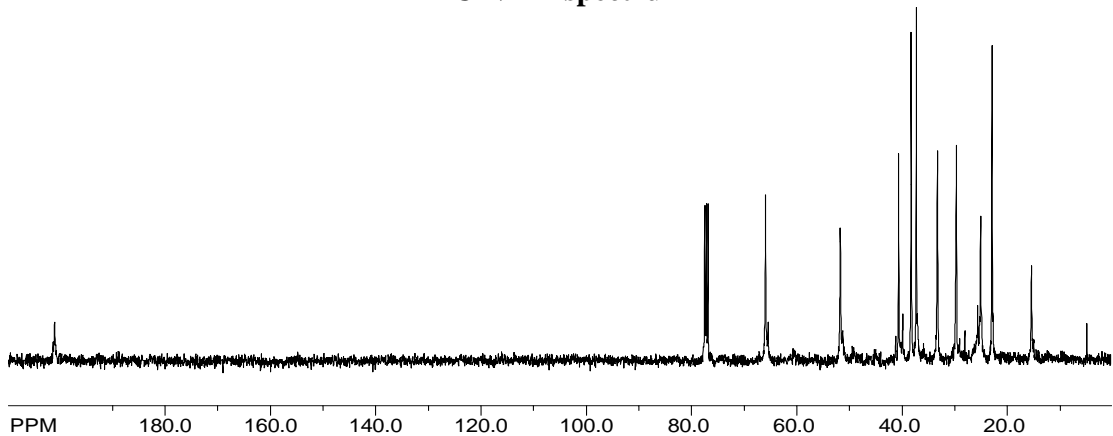

**$^{119}\text{Sn}$  NMR spectrum**

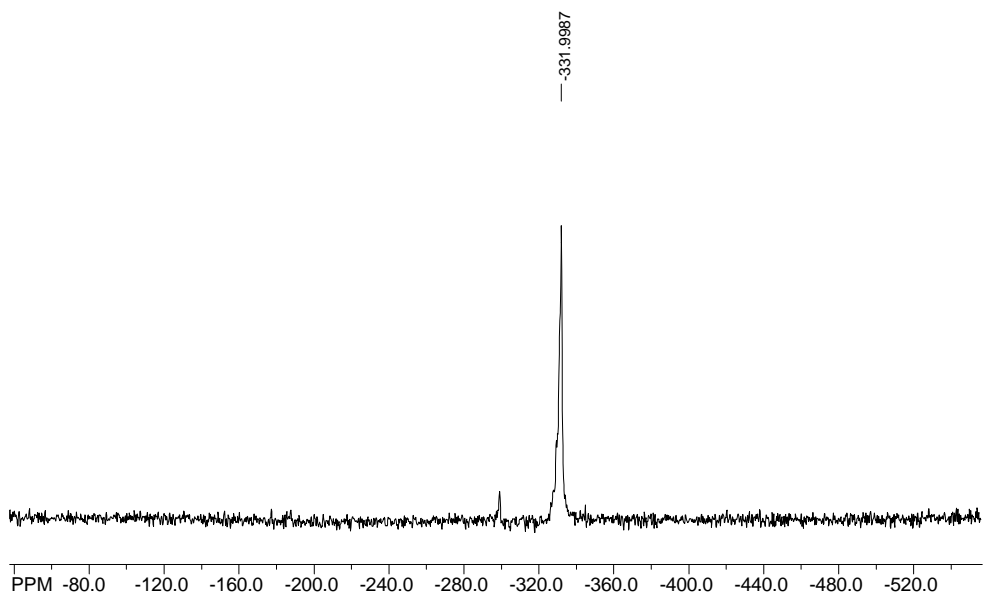

<sup>1</sup>H-<sup>1</sup>H COSY

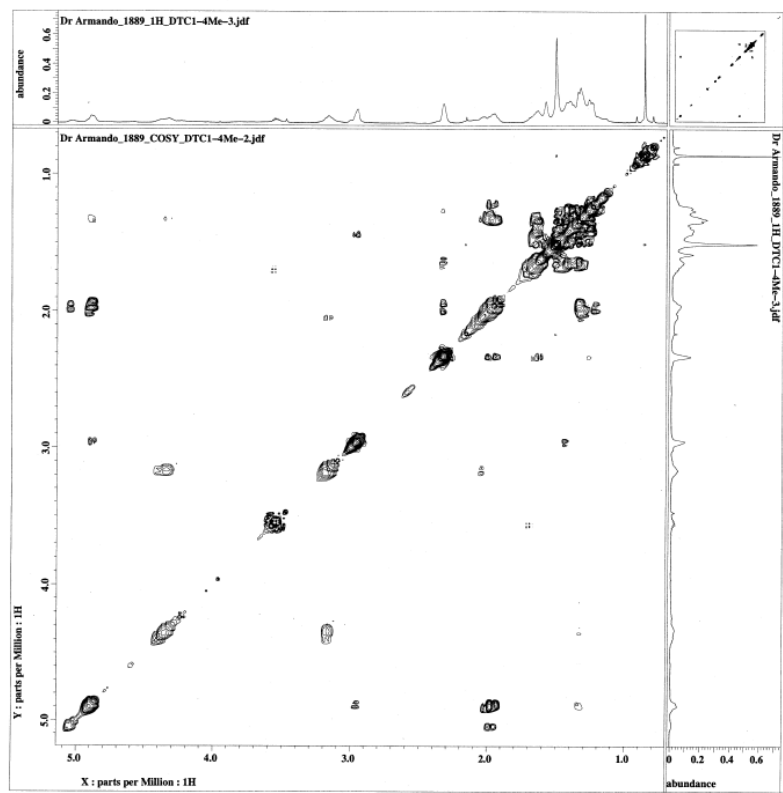

<sup>13</sup>C-<sup>1</sup>H HSQC NMR spectrum

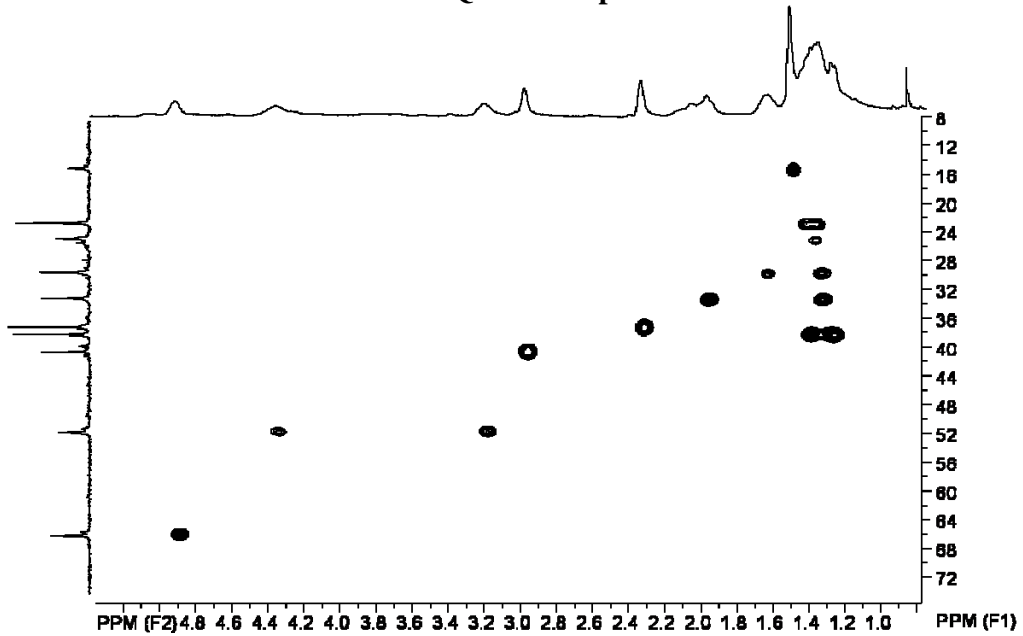

FAB<sup>+</sup> Mass spectrum

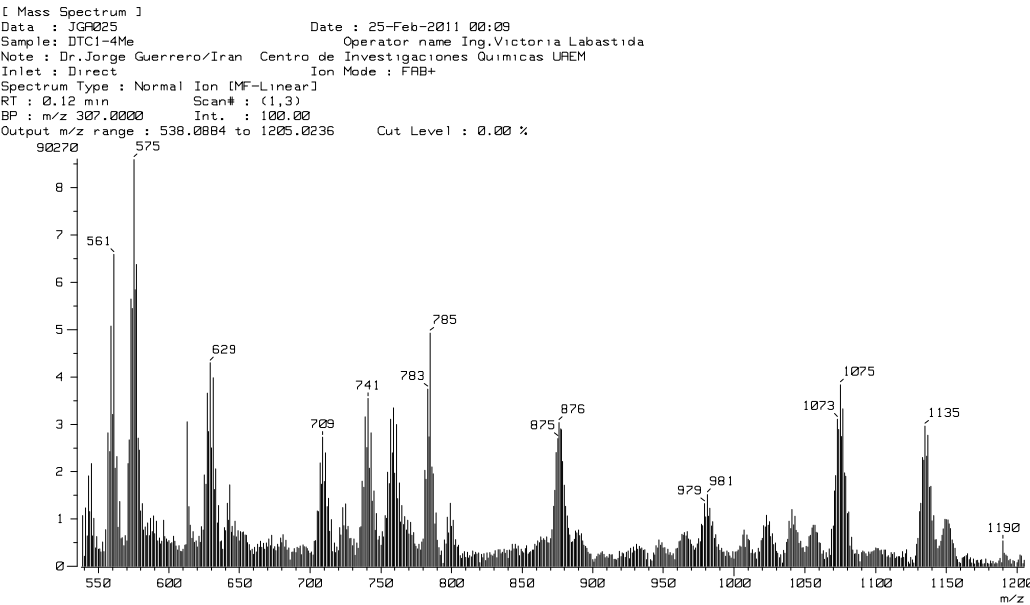

#### 4. Additional figures

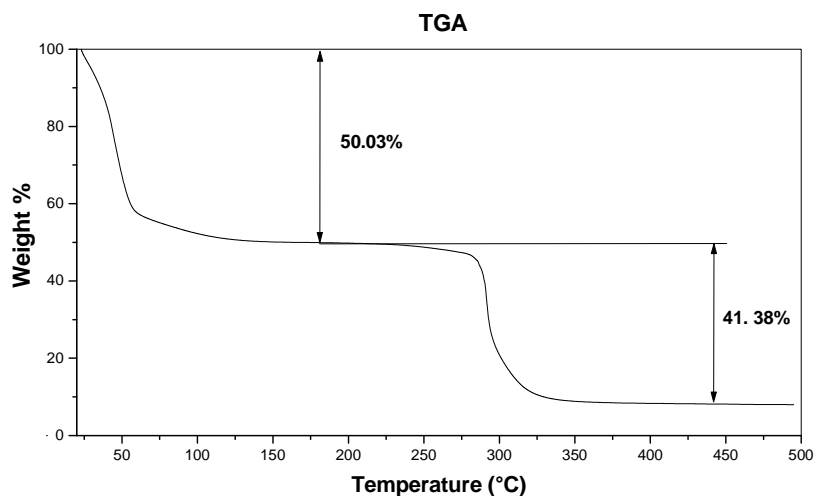

Figure S1. TGA graph of  $[\{Me_2Sn(1,4-bisdtc)\}_2] \cdot 10CDCl_3$

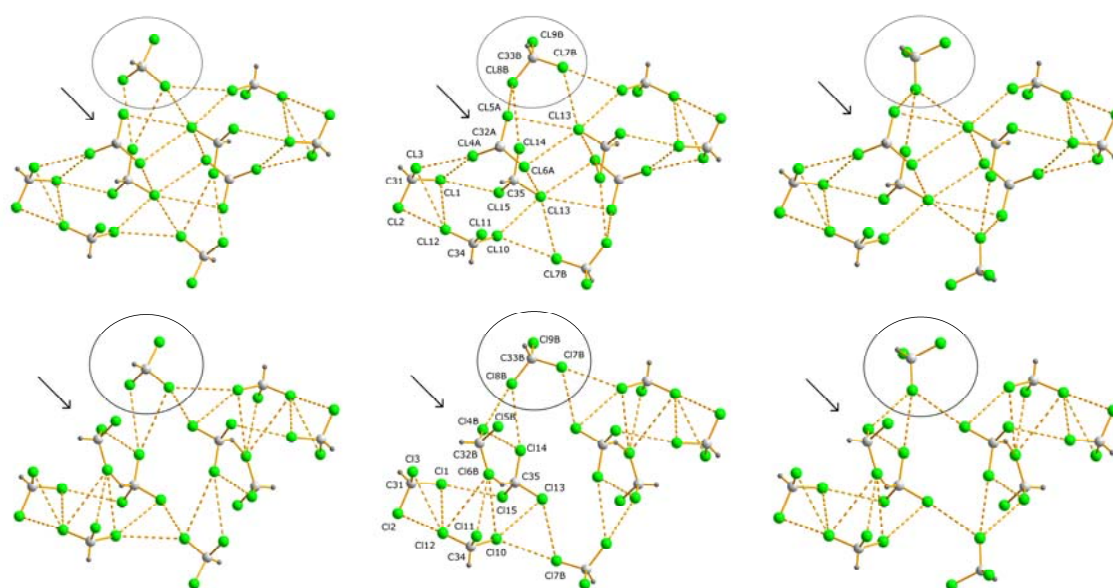

Figure S2. The disorder of two of the five independent  $CDCl_3$  molecules gives rise to two series of different cluster arrangements. The disordered deuteriochloroform molecules are marked by circles ( $CDCl_3$  disordered over three sites) and arrows ( $CDCl_3$  disordered over two sites). The threefold disordered  $CDCl_3$  molecules generate "snapshots of clusters, whose differences consist in a gradual outward-rotation of the molecule marked by the circle.

a)

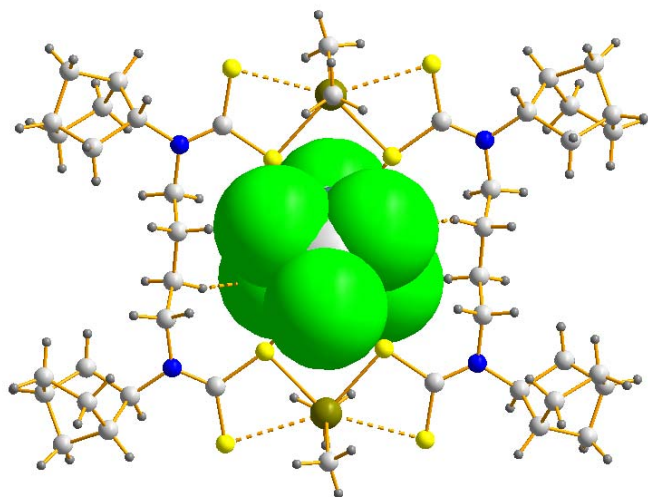

b)

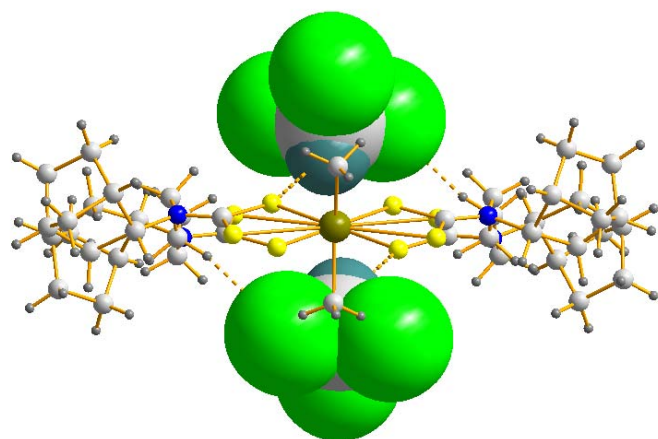

Figure S3. Supramolecular inclusion complex formed between the diorganotin macrocycle and two  $\text{CDCl}_3$  molecules, which are embedded in the cavities above and below the macrocycle plane. a) top view; b) lateral view.



## 5. Tables for the description of the intermolecular connectivity

Table S1. Intermolecular contacts between the diorganotin macrocycle and  $\text{CDCl}_3$  molecules in the crystal structure of  $[\{\text{Me}_2\text{Sn}(1,4\text{-bisdtc})\}_2] \cdot 10\text{CDCl}_3$ .

Note: For the case of the disordered  $\text{CDCl}_3$  molecules the analysis includes only those having the highest occupancy (C32A and C33B).

| Contact          | C–X<br>[Å] | X...Y<br>[Å] | $\angle\text{CXY}$<br>[°] | Symmetry code       |
|------------------|------------|--------------|---------------------------|---------------------|
| C31–Cl2...H8     | 1.743(5)   | 2.81         | 155                       | +x+1,+y,+z          |
| C31–Cl2...H13B   | 1.743(5)   | 2.95         | 137                       | +x+1,+y,+z          |
| C31–Cl3...H20A   | 1.747(5)   | 3.03         | 98                        | -x,+y-1/2,-z+1/2    |
| C31–D31...S3     | 1.00       | 2.55         | 161                       | -x+1,+ y+1/2,-z+1/2 |
| C32A–Cl5A...H21B | 1.743(6)   | 2.95         | 113                       | +x,+y,+z            |
| C32A–Cl5A...S1   | 1.743(6)   | 3.63         | 161                       | +x,+y,+z            |
| C32A–Cl6A...H16B | 1.745(7)   | 2.87         | 96                        | -x+1,+ y-1/2,-z+1/2 |
| C33B–Cl7B...H4B  | 1.724(11)  | 3.10         | 129                       | +x,-y+1/2,+z-1/2    |
| C33B–D33B...S2   | 1.00       | 2.97         | 141                       | -x+1, +y-1/2,-z+1/2 |
| C34–Cl11...H20A  | 1.748(4)   | 3.08         | 154                       | +x,- y+1/2,+z+1/2   |
| C34–D34...S4     | 1.00       | 2.69         | 161                       | +x,+y,+z            |
| C35–Cl15...H10A  | 1.752(6)   | 3.00         | 116                       | +x,+ y,+z           |

Table S2. Intermolecular Cl...Cl contacts between CCl<sub>3</sub> molecules in the crystal structure of [{Me<sub>2</sub>Sn(1,4-bisdte)}<sub>2</sub>].10CCl<sub>3</sub>. Note: The analysis includes only the clusters given in Figure 2.

| Interaction site  | Motif | Contact          | Cl...Cl [Å] | θ <sub>1</sub> [°] | θ <sub>2</sub> [°] | Symmetry code        |
|-------------------|-------|------------------|-------------|--------------------|--------------------|----------------------|
| <b>Cluster I</b>  | III   | C31-C11...Cl4A   | 4.0838(8)   | 87                 | 147                | +x,-y+1+1/2,+z-1/2   |
|                   | IV    | C31-C11...Cl12   | 4.0664(5)   | 73                 | 122                | -x+1,+y-1/2,-z+1/2   |
|                   | I     | C31-C11...Cl15   | 3.4081(6)   | 166                | 95                 | -x+1,+y-1/2,-z+1/2   |
|                   | V     | C31-C11...Cl15   | 3.4081(6)   | 166                | 127                | -x+1,+y-1/2,-z+1/2   |
|                   | IV    | C31-C12...Cl12   | 3.5433(7)   | 90                 | 158                | -x+1,+y-1/2,-z+1/2   |
|                   | II    | C31-C13...Cl11   | 3.4107(5)   | 150                | 144                | +x-1,-y+1+1/2,+z-1/2 |
|                   | IV    | C31-C13...Cl12   | 3.7090(7)   | 84                 | 141                | -x+1,+y-1/2,-z+1/2   |
|                   | III   | C31-C13...Cl4A   | 3.2776(5)   | 117                | 169                | +x,-y+1+1/2,+z-1/2   |
|                   | II    | C32A-C15A...Cl8B | 3.8493(5)   | 131                | 112                | +x,+y,+z             |
|                   | III   | C32A-C15A...Cl13 | 4.0133(7)   | 96                 | 147                | +x,+y,+z             |
|                   | III   | C32A-C16A...Cl13 | 3.6569(6)   | 109                | 110                | +x,+y,+z             |
|                   | VI    | C32A-C16A...Cl13 | 3.6472(5)   | 134                | 109                | -x+1,-y+2,-z+1       |
|                   | V     | C33B-C17B...Cl10 | 3.4323(5)   | 171                | 123                | +x,+y,+z             |
|                   | II    | C33B-C18B...Cl14 | 3.5635(8)   | 135                | 159                | -x+1,-y+2,-z+1       |
|                   | V     | C33B-C19B...Cl1  | 3.6132(5)   | 173                | 127                | -x+1,-y+1,-z+1       |
|                   | V     | C34-C110...Cl13  | 3.6192(6)   | 157                | 123                | +x,+y,+z             |
|                   | VI    | C35-C113...Cl6A  | 3.6569(6)   | 110                | 75                 | +x,+y,+z             |
|                   | V     | C35-C113...Cl7B  | 3.9887(6)   | 135                | 82                 | +x,+y,+z             |
|                   | V     | C35-C115...Cl9B  | 3.4475(7)   | 156                | 95                 | +x,-y+1+1/2,+z-1/2   |
| <b>Cluster II</b> | IV    | C31-C11...Cl12   | 4.066(2)    | 73                 | 122                | -x+1,+y-1/2,-z+1/2   |
|                   | I     | C31-C11...Cl15   | 3.408(2)    | 166                | 95                 | -x+1,+y-1/2,-z+1/2   |
|                   | V     | C31-C11...Cl15   | 3.408(2)    | 166                | 127                | -x+1,+y-1/2,-z+1/2   |
|                   | IV    | C31-C12...Cl12   | 3.543(2)    | 90                 | 158                | -x+1,+y-1/2,-z+1/2   |
|                   | V     | C31-C13...Cl6B   | 3.72(1)     | 142                | 150                | -x,+y-1/2,-z+1/2     |
|                   | IV    | C31-C13...Cl12   | 3.709(2)    | 84                 | 141                | -x+1,+y-1/2,-z+1/2   |
|                   | --    | C32B-C15B...Cl12 | 3.54(1)     | 76                 | 129                | +x-1,+y,+z           |
|                   | --    | C32B-D32B...Cl12 | 2.77(3)     | 134                | --                 | +x-1,+y,+z           |
|                   | V     | C32B-C16B...Cl11 | 3.56(1)     | 144                | 93                 | -x+1,-y+2,-z+1       |
|                   | V     | C32B-C14B...Cl8B | 3.54(2)     | 149                | 125                | +x,+y,+z             |
|                   | V     | C33B-C17B...Cl10 | 3.433(5)    | 171                | 123                | +x,+y,+z             |
|                   | II    | C33B-C18B...Cl14 | 3.563(5)    | 135                | 141                | -x+1,-y+2,-z+1       |
|                   | V     | C33B-C19B...Cl1  | 3.613(6)    | 173                | 127                | -x+1,-y+1,-z+1       |
|                   | IV    | C34-C110...Cl6B  | 3.721(9)    | 84                 | 158                | 1-x,2-y,1-z          |
|                   | IV    | C34-C111...Cl6B  | 3.56(1)     | 89                 | 144                | 1-x,2-y,1-z          |
|                   | IV    | C34-C112...Cl6B  | 4.09(1)     | 73                 | 125                | 1-x,2-y,1-z          |
|                   | V     | C34-C110...Cl13  | 3.619(2)    | 157                | 123                | +x,+y,+z             |
|                   | V     | C34-C111...Cl3   | 3.411(2)    | 144                | 89                 | +x+1,-y+1+1/2,+z+1/2 |
|                   | V     | C35-C113...Cl7B  | 3.989(6)    | 135                | 82                 | +x,+y,+z             |
|                   | V     | C35-C114...Cl4B  | 3.26(2)     | 159                | 97                 | -x+1,-y+2,-z+1       |
|                   | V     | C35-C115...Cl9B  | 3.447(7)    | 156                | 95                 | +x,-y+1+1/2,+z-1/2   |
|                   | --    | C35-D35...Cl6B   | 2.96        | 147                | --                 | -x+1,-y+2,-z+1       |
